# Supplementary material for: Temperature-dependent seminal recovery in the southern king crab Lithodes santolla
Source: R Soc Open Sci. 2019 Mar 6;6(3):181700. doi: 10.1098/rsos.181700 (PMC6458361; doi:10.1098/rsos.181700)
Supplement: Dry weight of the hepatopancreas of Lithodes santolla after the corresponding time periods at 9°C and 12°C [file rsos181700supp3.xlsx]

## Sheet: Hoja1
Time period (days)	Electroejaculated on day 0	Temperature (°C)	Hepatopancreas dry weight (g)
0	No		6.6924
0	No		4.87685
0	No		7.35502
0	No		2.6077
0	No		4.18239
0	Yes		4.01889
0	Yes		4.0914
0	Yes		5.88791
0	Yes		12.2429
0	Yes		4.14307
15	Yes	12	6.58
15	Yes	12	13.83
15	Yes	12	9.22
15	Yes	12	5.27
15	Yes	12	9.46
15	Yes	9	7.86
15	Yes	9	5.67
15	Yes	9	6.58
15	Yes	9	8.97
15	Yes	9	4.28
30	Yes	12	8.95
30	Yes	12	13.12
30	Yes	12	9.48
30	Yes	12	7.8
30	Yes	12	10.79
30	Yes	9	9.97
30	Yes	9	12.24
30	Yes	9	11.77
30	Yes	9	9.64
30	Yes	9	9.24
30	No	12	13.47
30	No	12	15.22
30	No	12	16.46
30	No	12	8.09
30	No	12	11.2
30	No	9	14.32
30	No	9	9.87
30	No	9	11.19
30	No	9	12.92
30	No	9	9.65
