# Supplementary material for: Temperature-dependent seminal recovery in the southern king crab Lithodes santolla
Source: R Soc Open Sci. 2019 Mar 6;6(3):181700. doi: 10.1098/rsos.181700 (PMC6458361; doi:10.1098/rsos.181700)
Supplement: Dry weight of the left vasa deferentia after the corresponding time periods at 9°C and 12°C in Lithodes santolla [file rsos181700supp1.xlsx]

## Sheet: Hoja1
Time period (days)	Electroejaculated on day 0	Temperature (°C)	Carapace length (mm)	Dry weight left vas deferens (g)
0	No		116.1	0.02172
0	No		122.7	0.02139
0	No		105.2	0.01447
0	No		105.1	0.013098
0	Yes		104.9	0.01216
0	Yes		110.9	0.00658
0	Yes		111.2	0.00342
0	Yes		119.2	0.01017
0	Yes		98.3	0.0046
15	Yes	12	115.8	0.01043
15	Yes	12	114	0.01361
15	Yes	12	108.1	0.00898
15	Yes	12	113.7	0.00266
15	Yes	12	122.9	0.01181
15	Yes	9	105	0.00901
15	Yes	9	117.9	0.0122
15	Yes	9	111.8	0.00773
15	Yes	9	114.3	0.00947
15	Yes	9	110	0.00831
30	Yes	12	108.4	0.00964
30	Yes	12	112.4	0.00806
30	Yes	12	114.3	0.01218
30	Yes	12	103.7	0.00735
30	Yes	12	114.4	0.01009
30	Yes	9	121.5	0.01281
30	Yes	9	112.5	0.01476
30	Yes	9	109.1	0.01234
30	Yes	9	115.4	0.01137
30	Yes	9	106.9	0.00723
30	No	12	110.8	0.01752
30	No	12	107.6	0.01208
30	No	12	111.3	0.0223
30	No	12	117.7	0.0107
30	No	12	104.4	0.01904
30	No	9	112.1	0.01146
30	No	9	111	0.02349
30	No	9	119.5	0.02712
30	No	9	106.6	0.01894
30	No	9	111.5	0.02581
